# Supplementary material for: Facile synthesis of novel porous self-assembling hydrogen-bonding covalent organic polymers and their applications towards fluoroquinolone antibiotics adsorption
Source: Royal Society of Chemistry journal article supplement (doi:10.1039/c8ra06806b), 2018-01-01
Supplement: c8ra06806b1.pdf [file c8ra06806b1.pdf]

Electronic Supplementary Material (ESI) for RSC Advances.

This journal is © The Royal Society of Chemistry 2018

***Supporting information for***

**Facile synthesis of novel porous self-assembling hydrogen-bonding  
covalent organic polymers and their applications towards  
fluoroquinolone antibiotics adsorption**

Zhuoran Li,<sup>a</sup> Feifan Xu,<sup>a</sup> Zhi Liu,<sup>b</sup> Chuanyu Qin,<sup>a</sup> Hao Ren<sup>c</sup> and Yangxue Li<sup>a\*</sup>

*<sup>a</sup> Key Lab of Groundwater Resources and Environment, Ministry of Education, Jilin University, 2519 Jiefang Road, Changchun 130021, P. R. China;*

*<sup>b</sup> School of Municipal and Environmental Engineering, Jilin Jianzhu University, 5088 Xincheng Street, Changchun 130118, P. R. China;*

*<sup>c</sup> State Key Laboratory of Inorganic Synthesis and Preparative Chemistry, College of Chemistry, Jilin University, Changchun 130012, P.R. China*

1. PXRD spectra
2. FT-IR spectra
3. TGA curves
4. N<sub>2</sub> adsorption isotherms and pore size distribution
5. Zeta potential curves
6. Adsorption experiments
7. Tables
8. SEM images of the H<sub>C</sub>OPs after fluoroquinolones adsorption
9. FT-IR spectra of the H<sub>C</sub>OPs after fluoroquinolones adsorption
10. Supporting references

## 1. PXRD spectra

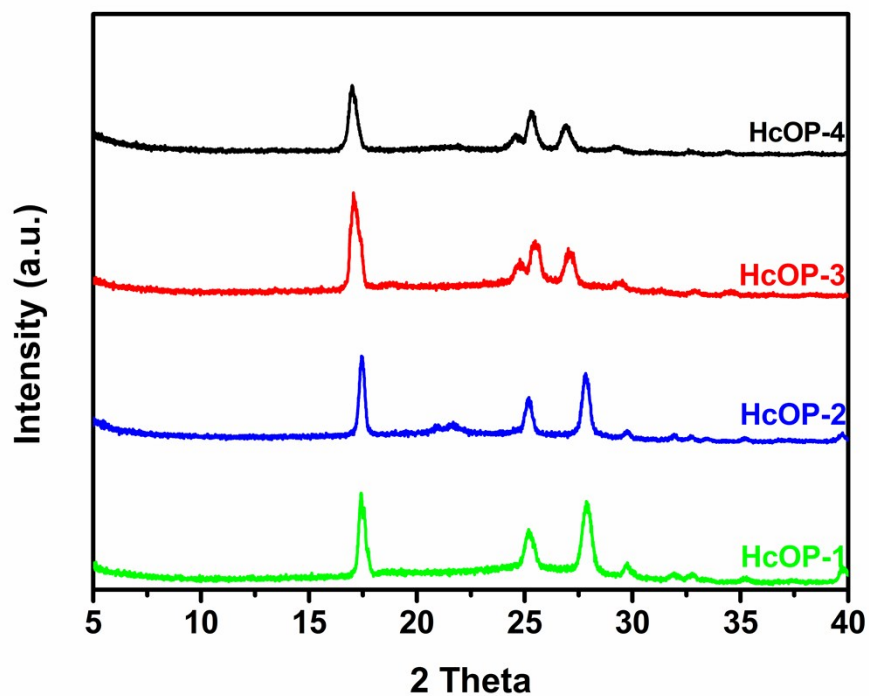

Figure S1 PXRD spectra of H<sub>C</sub>OPs.

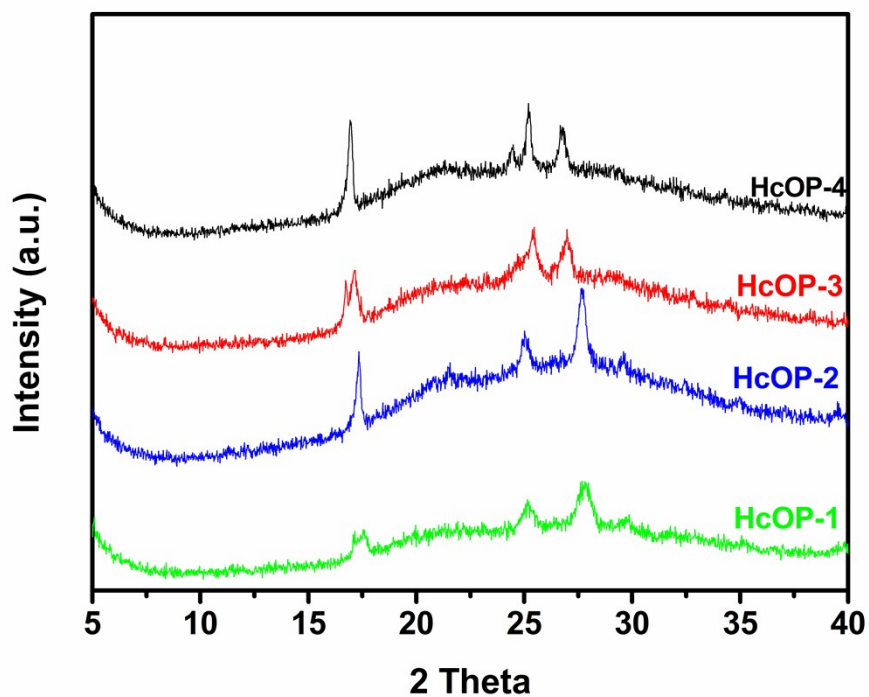

Figure S2 PXRD spectra of H<sub>C</sub>OPs after soaking in concentrated HCl for 3 days.

## 2. FT-IR spectra

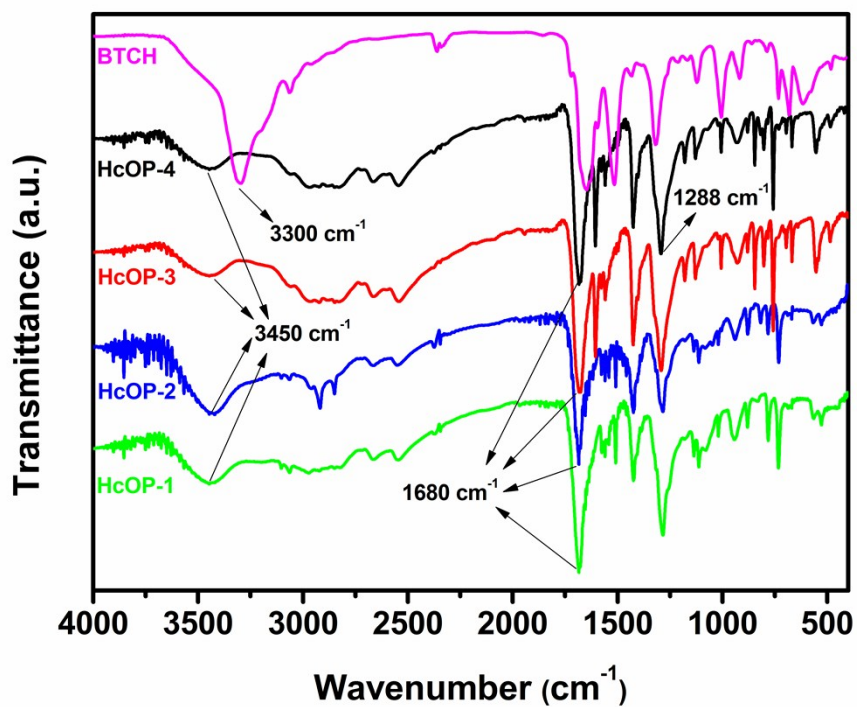

Figure S3 FT-IR spectra of BTCH monomer and H<sub>c</sub>OPs.

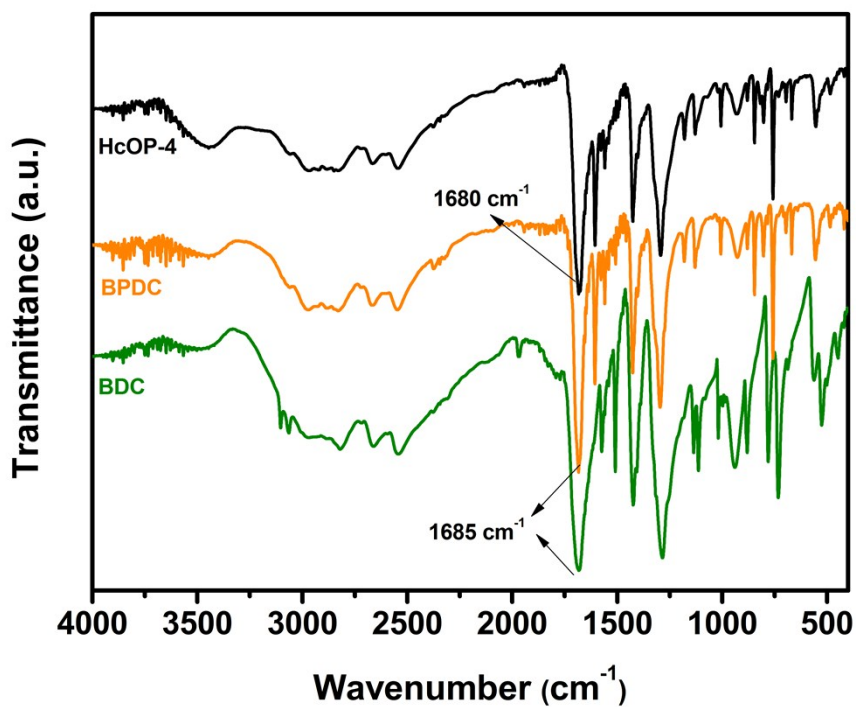

Figure S4 FT-IR spectra of BDC (or BPDC) monomers and H<sub>c</sub>OP-4.

### 3. TGA curves

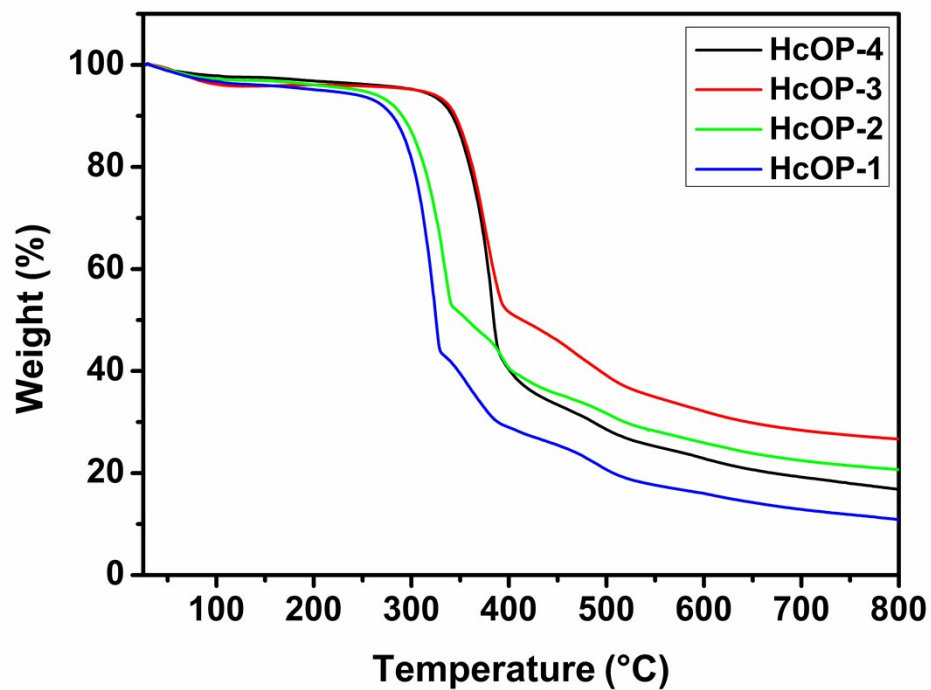

Figure S5 TGA curves of H<sub>C</sub>OPs.

#### 4. N<sub>2</sub> adsorption isotherms and pore size distribution

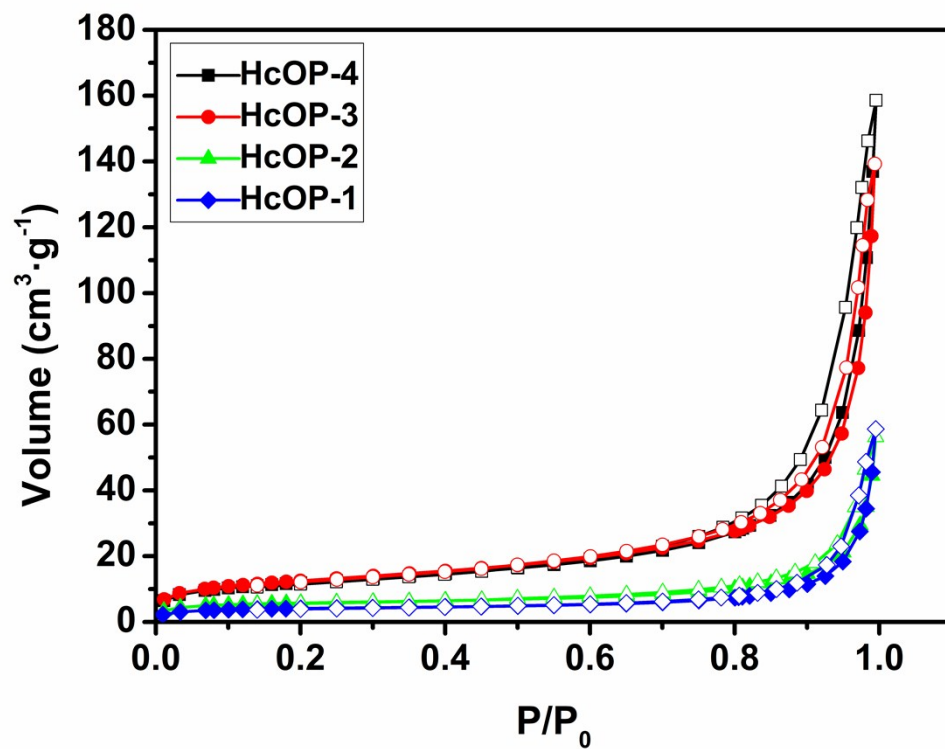

Figure S6 Nitrogen adsorption and desorption isotherms of H<sub>C</sub>OPs measured at 77 K.

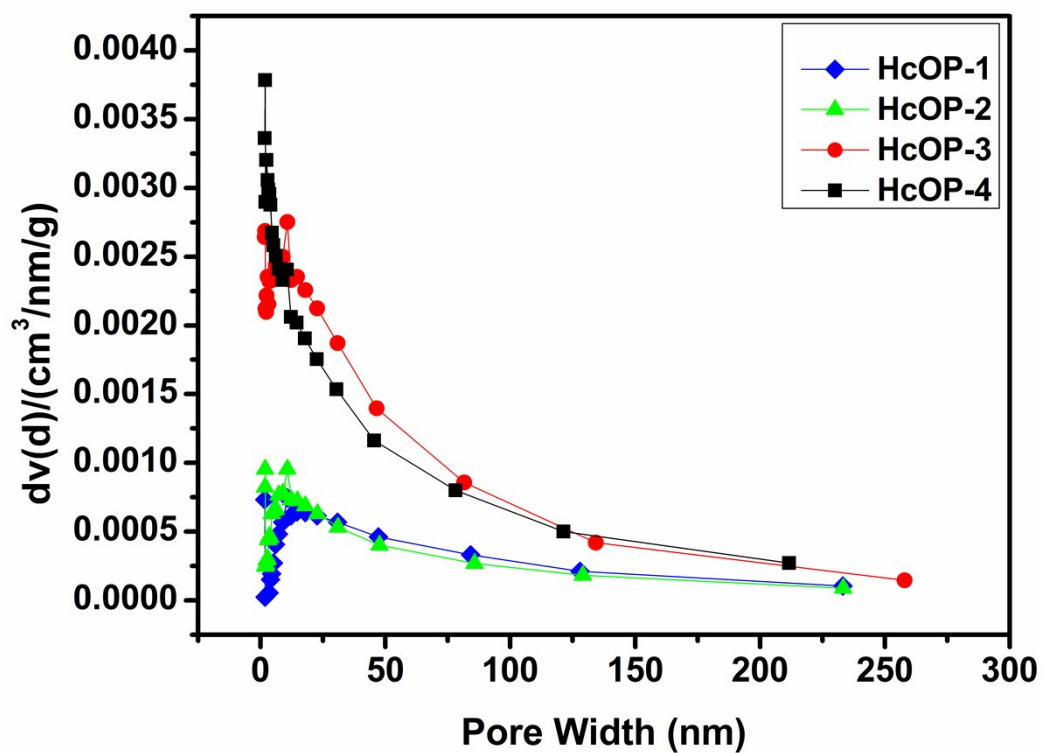

Figure S7 Pore size distributions of H<sub>C</sub>OPs.

**Table S1** Adsorption characteristics of H<sub>c</sub>OPs.

| H <sub>c</sub> OPs  | <i>BET</i><br>(m <sup>2</sup> g <sup>-1</sup> ) | <i>Langmuir</i><br>(m <sup>2</sup> g <sup>-1</sup> ) | <i>Pore volume</i><br>(cm <sup>3</sup> g <sup>-1</sup> ) |
|---------------------|-------------------------------------------------|------------------------------------------------------|----------------------------------------------------------|
| H <sub>c</sub> OP-1 | 13                                              | 20                                                   | 0.04                                                     |
| H <sub>c</sub> OP-2 | 18                                              | 28                                                   | 0.04                                                     |
| H <sub>c</sub> OP-3 | 41                                              | 65                                                   | 0.12                                                     |
| H <sub>c</sub> OP-4 | 43                                              | 68                                                   | 0.14                                                     |

## 5. Zeta potential curves

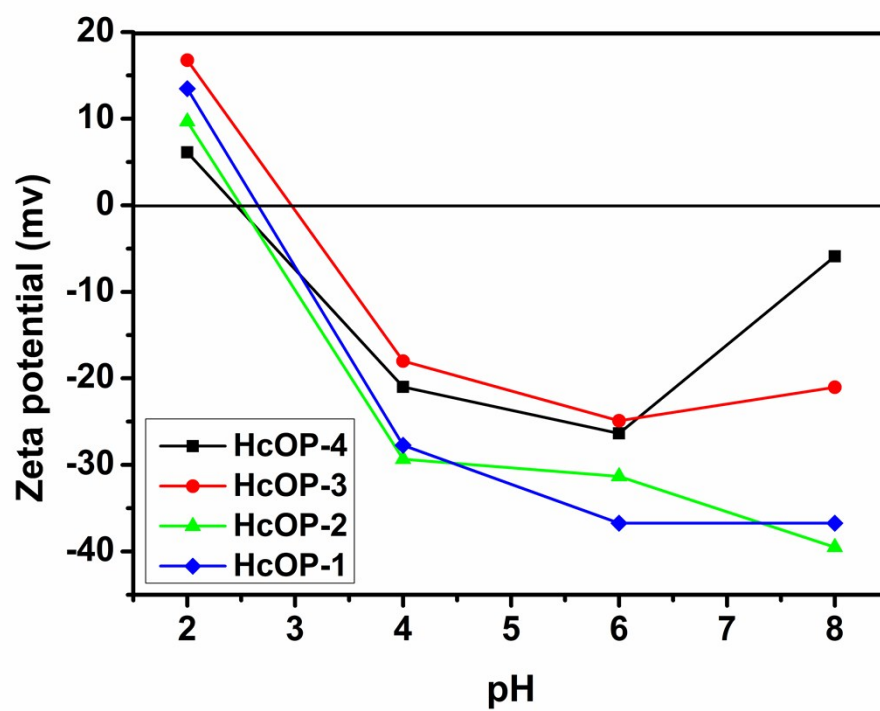

Figure S8 Zeta potential curves *versus* pH of the H<sub>c</sub>OPs.

## 6. Adsorption experiments

Equations 1, 2 and 3 were used to calculate the removal efficiency ( $E$ , %), the adsorption amount of fluoroquinolones by H<sub>C</sub>OPs at desired time  $t$  ( $q_t$ , mg g<sup>-1</sup>) and the adsorption capacity of fluoroquinolones by H<sub>C</sub>OPs at equilibrium ( $q_e$ , mg g<sup>-1</sup>), respectively:<sup>[1]</sup>

$$E (\%) = \frac{C_0 - C_e}{C_0} \times 100\% \quad (1)$$

$$q_e = \frac{(C_0 - C_e)V}{m} \quad (2)$$

$$q_t = \frac{(C_0 - C_t)V}{m} \quad (3)$$

where  $C_0$  (mg L<sup>-1</sup>) and  $C_e$  (mg L<sup>-1</sup>) are the initial concentrations of fluoroquinolones and the equilibrium concentrations of fluoroquinolones, respectively;  $m$  (g) is the mass of adsorbent used;  $V$  (L) is the total volume of solution used.



## 6.1 Calibration plots of standard ciprofloxacin and norfloxacin

A series of fluoroquinolone solutions with different concentrations at a range of pH values from 2.0 to 10.0 were prepared as standards. The calibrated plots all exhibited a good correlation coefficient.

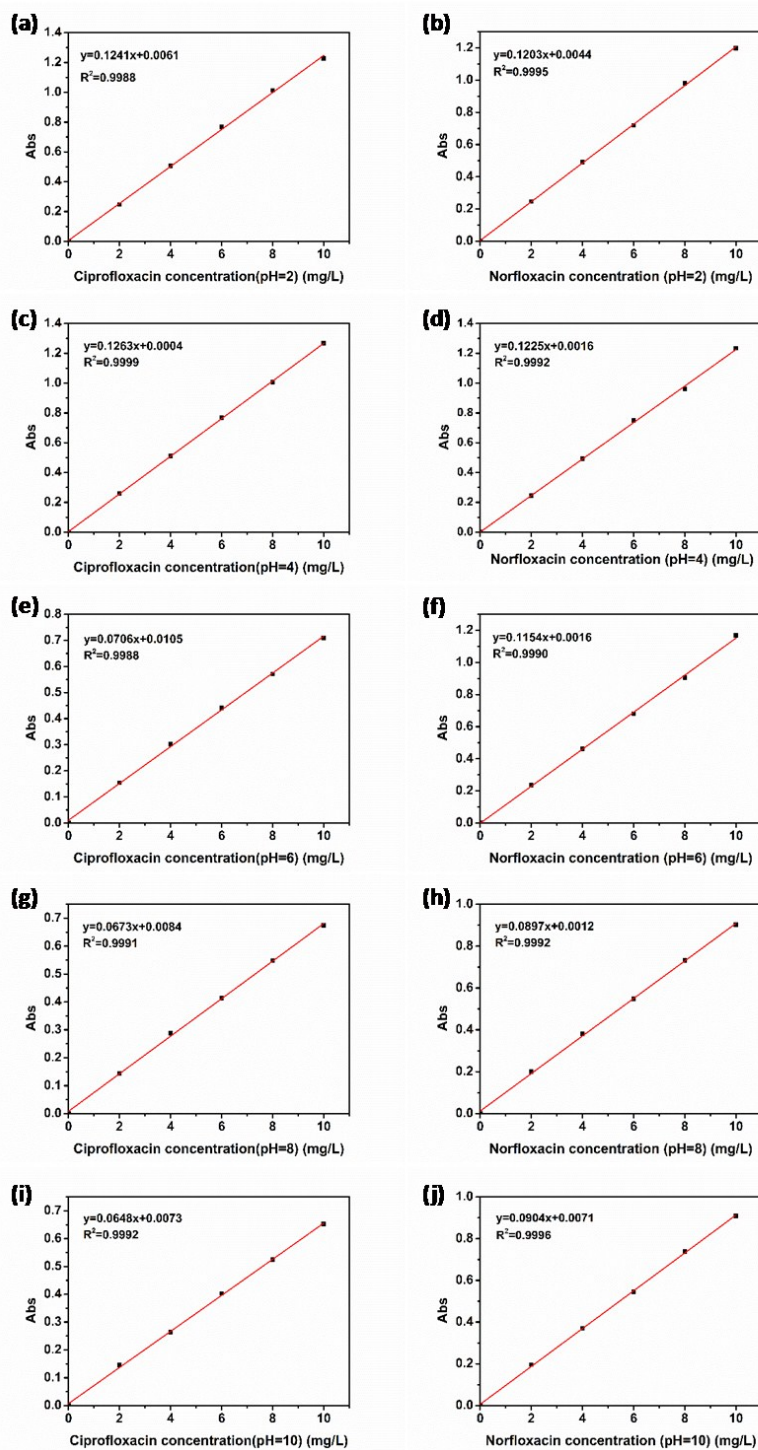

Figure S9 The standard curves of the ciprofloxacin and norfloxacin.

## 6.2 Adsorption kinetic

The adsorption kinetic were studied using experiments with different contacting time at initial fluoroquinolone concentration of 10 mg/L at pH = 6.0. Pseudo-first-order kinetic, pseudo-second-order kinetic models and intraparticle diffusion model are described as the following functions:<sup>[2-4]</sup>

$$\ln(q_e - q_t) = \ln q_e - k_1 t \quad (4)$$

$$\frac{t}{q_t} = \frac{1}{k_2 q_e^2} + \frac{t}{q_e} \quad (5)$$

$$q_t = k_i t^{1/2} + C \quad (6)$$

where  $q_t$  (mg g<sup>-1</sup>) and  $q_e$  (mg g<sup>-1</sup>) represent the same as above;  $k_1$  (h<sup>-1</sup>) and  $k_2$  (g mg<sup>-1</sup> h<sup>-1</sup>) are the pseudo-first-order and the pseudo-second-order rate constants, respectively.  $k_i$  (mg g<sup>-1</sup> h<sup>-1/2</sup>) is the diffusion rate constant and  $C$  (mg g<sup>-1</sup>) is the intercept which are proportional to the extent of boundary layer thickness.

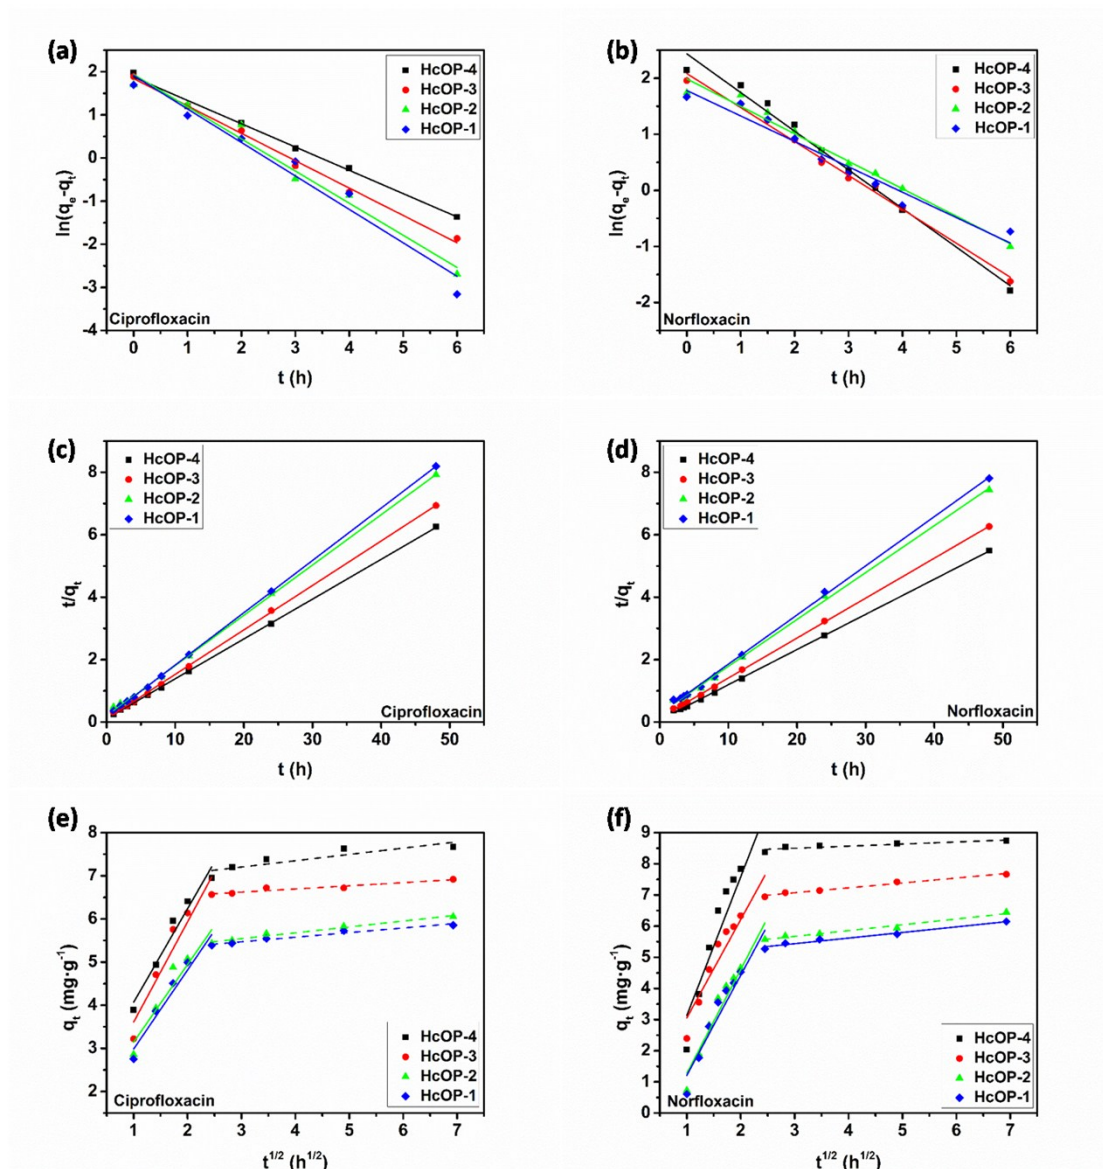

**Figure S10** (a) and (b) Pseudo-first-order curve-fittings for fluoroquinolones adsorption onto H<sub>c</sub>OPs; (c) and (d) Pseudo-second-order curve-fittings for fluoroquinolones adsorption onto H<sub>c</sub>OPs; (e) and (f) Intraparticle diffusion models for fluoroquinolones adsorption onto H<sub>c</sub>OPs.

### 6.3 Adsorption isotherms analysis

The Langmuir sorption isotherm is often applied for the monolayer adsorption process, while the well-known Freundlich isotherm is based on sorption on heterogeneous surface with multilayer adsorption. The Langmuir isotherm and Freundlich isotherm models can be represented as following equations:<sup>[5-6]</sup>

$$\frac{C_e}{q_e} = \frac{1}{bq_m} + \frac{C_e}{q_m} \quad (7)$$

$$\ln q_e = \ln K_F + \frac{1}{n} \ln C_e \quad (8)$$

where  $q_e$  ( $\text{mg L}^{-1}$ ) is the adsorption capacity at equilibrium status,  $C_e$  ( $\text{mg L}^{-1}$ ) is the concentration of fluoroquinolones in solution at equilibrium status, and  $b$  ( $\text{L mg}^{-1}$ ) is the Langmuir constant. In addition, the  $q_m$  is the maximum adsorption capacity of the adsorbent.  $K_F$  ( $\text{L g}^{-1}$ ) is the Freundlich constant concerned with the adsorption capacity and  $1/n$  corresponds to the heterogeneity factor.

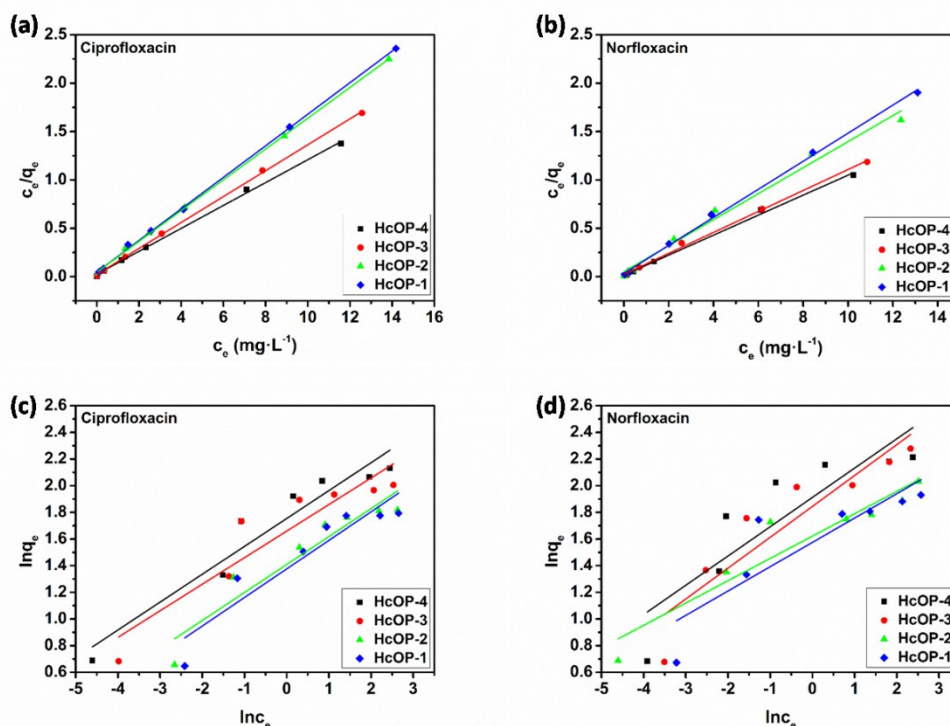

**Figure S11** (a) and (b) Langmuir linear fittings for the fluoroquinolones adsorption onto H<sub>c</sub>OPs; (c) and (d) Freundlich linear fittings for the fluoroquinolones adsorption onto H<sub>c</sub>OPs .

## 7. Tables

**Table S2** Removal efficiencies and kinetic parameters for the adsorption of ciprofloxacin onto H<sub>C</sub>OPs.

| H <sub>C</sub> OPs  | Removal Efficiency (%) | $q_{e,exp}$ (mg·g <sup>-1</sup> ) | Pseudo-first-order kinetics |                                   |       | Pseudo-second-order kinetics                 |                                   |       |
|---------------------|------------------------|-----------------------------------|-----------------------------|-----------------------------------|-------|----------------------------------------------|-----------------------------------|-------|
|                     |                        |                                   | $k_1$ (h <sup>-1</sup> )    | $q_{e,cal}$ (mg·g <sup>-1</sup> ) | $R^2$ | $k_2$ (g·mg <sup>-1</sup> ·h <sup>-1</sup> ) | $q_{e,cal}$ (mg·g <sup>-1</sup> ) | $R^2$ |
| H <sub>C</sub> OP-1 | 57.3%                  | 5.73                              | 0.78                        | 6.30                              | 0.96  | 0.13                                         | 5.97                              | 0.99  |
| H <sub>C</sub> OP-2 | 58.3%                  | 5.83                              | 0.75                        | 6.55                              | 0.98  | 0.14                                         | 6.21                              | 0.99  |
| H <sub>C</sub> OP-3 | 67.2%                  | 6.72                              | 0.64                        | 6.59                              | 0.98  | 0.18                                         | 6.80                              | 0.99  |
| H <sub>C</sub> OP-4 | 76.3%                  | 7.63                              | 0.54                        | 6.89                              | 0.98  | 0.19                                         | 7.84                              | 0.99  |

**Table S3** Intraparticle diffusion model parameters for the adsorption of ciprofloxacin onto H<sub>C</sub>OPs.

| H <sub>C</sub> OPs  | Intraparticle diffusion model                      |                             |       |                                                    |                             |       |
|---------------------|----------------------------------------------------|-----------------------------|-------|----------------------------------------------------|-----------------------------|-------|
|                     | $k_{i,1}$ (mg·g <sup>-1</sup> ·h <sup>-1/2</sup> ) | $C_1$ (mg·g <sup>-1</sup> ) | $R^2$ | $k_{i,2}$ (mg·g <sup>-1</sup> ·h <sup>-1/2</sup> ) | $C_2$ (mg·g <sup>-1</sup> ) | $R^2$ |
| H <sub>C</sub> OP-1 | 1.83                                               | 1.15                        | 0.94  | 0.11                                               | 5.13                        | 0.95  |
| H <sub>C</sub> OP-2 | 1.80                                               | 1.35                        | 0.88  | 0.14                                               | 5.13                        | 0.94  |
| H <sub>C</sub> OP-3 | 2.32                                               | 1.29                        | 0.89  | 0.07                                               | 6.40                        | 0.89  |
| H <sub>C</sub> OP-4 | 2.17                                               | 1.90                        | 0.95  | 0.15                                               | 6.77                        | 0.72  |

**Table S4** Removal efficiencies and kinetic parameters for the adsorption of norfloxacin onto H<sub>C</sub>OPs.

| H <sub>C</sub> OPs  | Removal Efficiency (%) | $q_{e,exp}$ (mg·g <sup>-1</sup> ) | Pseudo-first-order kinetics |                                   |       | Pseudo-second-order kinetics                 |                                   |       |
|---------------------|------------------------|-----------------------------------|-----------------------------|-----------------------------------|-------|----------------------------------------------|-----------------------------------|-------|
|                     |                        |                                   | $k_1$ (h <sup>-1</sup> )    | $q_{e,cal}$ (mg·g <sup>-1</sup> ) | $R^2$ | $k_2$ (g·mg <sup>-1</sup> ·h <sup>-1</sup> ) | $q_{e,cal}$ (mg·g <sup>-1</sup> ) | $R^2$ |
| H <sub>C</sub> OP-1 | 58.6%                  | 5.86                              | 0.45                        | 5.03                              | 0.96  | 0.08                                         | 6.35                              | 0.99  |
| H <sub>C</sub> OP-2 | 60.6%                  | 6.06                              | 0.49                        | 7.32                              | 0.98  | 0.09                                         | 6.66                              | 0.99  |
| H <sub>C</sub> OP-3 | 69.2%                  | 6.92                              | 0.61                        | 8.01                              | 0.98  | 0.12                                         | 7.82                              | 0.99  |
| H <sub>C</sub> OP-4 | 76.7%                  | 7.67                              | 0.69                        | 11.35                             | 0.98  | 0.18                                         | 8.87                              | 0.99  |

**Table S5** Intraparticle diffusion model parameters for the norfloxacin of ciprofloxacin onto H<sub>C</sub>OPs.

| H <sub>C</sub> OPs  | Intraparticle diffusion model                      |                             |       |                                                    |                             |       |
|---------------------|----------------------------------------------------|-----------------------------|-------|----------------------------------------------------|-----------------------------|-------|
|                     | $k_{i,1}$ (mg·g <sup>-1</sup> ·h <sup>-1/2</sup> ) | $C_1$ (mg·g <sup>-1</sup> ) | $R^2$ | $k_{i,2}$ (mg·g <sup>-1</sup> ·h <sup>-1/2</sup> ) | $C_2$ (mg·g <sup>-1</sup> ) | $R^2$ |
| H <sub>C</sub> OP-1 | 3.21                                               | 2.00                        | 0.91  | 0.18                                               | 4.90                        | 0.97  |
| H <sub>C</sub> OP-2 | 3.33                                               | 2.06                        | 0.93  | 0.19                                               | 5.12                        | 0.97  |
| H <sub>C</sub> OP-3 | 3.15                                               | 1.10                        | 0.89  | 0.16                                               | 6.60                        | 0.98  |
| H <sub>C</sub> OP-4 | 4.45                                               | 1.32                        | 0.85  | 0.07                                               | 8.30                        | 0.74  |

**Table S6** Adsorption parameters of Langmuir adsorption isotherm model for the adsorption of ciprofloxacin onto H<sub>C</sub>OPs.

| Langmuir isotherm | H <sub>C</sub> OPs  | $q_m$ | $K_L$ | $R^2$ |
|-------------------|---------------------|-------|-------|-------|
| L                 | H <sub>C</sub> OP-1 | 6.13  | 3.44  | 0.99  |
|                   | H <sub>C</sub> OP-2 | 6.29  | 3.46  | 0.99  |
|                   | H <sub>C</sub> OP-3 | 7.46  | 5.76  | 0.99  |
|                   | H <sub>C</sub> OP-4 | 8.47  | 4.60  | 0.99  |

**Table S7** Adsorption parameters of Freundlich adsorption isotherm model for the adsorption of ciprofloxacin onto H<sub>C</sub>OPs.

| Freundlich isotherm | H <sub>C</sub> OPs  | $n$  | $K_F$ | $R^2$ |
|---------------------|---------------------|------|-------|-------|
| F                   | H <sub>C</sub> OP-1 | 4.67 | 3.96  | 0.85  |
|                     | H <sub>C</sub> OP-2 | 4.77 | 4.09  | 0.88  |
|                     | H <sub>C</sub> OP-3 | 5.02 | 5.26  | 0.84  |
|                     | H <sub>C</sub> OP-4 | 4.78 | 5.78  | 0.91  |

**Table S8** Adsorption parameters of Langmuir adsorption isotherm model for the adsorption of norfloxacin onto H<sub>C</sub>OPs.

| Langmuir isotherm | H <sub>C</sub> OPs  | $q_m$ | $K_L$ | $R^2$ |
|-------------------|---------------------|-------|-------|-------|
| L                 | H <sub>C</sub> OP-1 | 6.89  | 4.44  | 0.99  |
|                   | H <sub>C</sub> OP-2 | 7.44  | 2.62  | 0.99  |
|                   | H <sub>C</sub> OP-3 | 9.22  | 4.62  | 0.99  |
|                   | H <sub>C</sub> OP-4 | 9.67  | 6.55  | 0.99  |

**Table S9** Adsorption parameters of Freundlich adsorption isotherm model for the adsorption of norfloxacin onto H<sub>C</sub>OPs.

| Freundlich isotherm | H <sub>C</sub> OPs  | $n$  | $K_F$ | $R^2$ |
|---------------------|---------------------|------|-------|-------|
| F                   | H <sub>C</sub> OP-1 | 5.48 | 4.83  | 0.72  |
|                     | H <sub>C</sub> OP-2 | 5.97 | 5.06  | 0.88  |
|                     | H <sub>C</sub> OP-3 | 4.32 | 6.33  | 0.82  |
|                     | H <sub>C</sub> OP-4 | 4.55 | 6.77  | 0.75  |



**Table S10** Comparison of the maximum adsorption capacity of fluoroquinolones on different adsorbents.

| S.N.     | Adsorbents              | Pollutants       | Adsorption capacity<br>(mg g <sup>-1</sup> ) | T<br>(K)   | Reference        |
|----------|-------------------------|------------------|----------------------------------------------|------------|------------------|
| 1        | Modified coal fly ash   | CIP              | 1.55                                         | 313        | 7                |
| 2        | Kaolinite               | CIP              | 3.26                                         | 295        | 7                |
| 3        | Kaolinite               | CIP              | 7.95                                         | 308        | 8                |
| 4        | MCM-41                  | NOR              | 1.74                                         | 298        | 9                |
| 5        | C <sub>16</sub> -MCM-41 | NOR              | 1.52                                         | 298        | 9                |
| <b>6</b> | <b>HcOP-1</b>           | <b>CIP / NOR</b> | <b>6.13 / 6.89</b>                           | <b>298</b> | <b>This work</b> |
| <b>7</b> | <b>HcOP-2</b>           | <b>CIP / NOR</b> | <b>6.29 / 7.44</b>                           | <b>298</b> | <b>This work</b> |
| <b>8</b> | <b>HcOP-3</b>           | <b>CIP / NOR</b> | <b>7.46 / 9.22</b>                           | <b>298</b> | <b>This work</b> |
| <b>9</b> | <b>HcOP-4</b>           | <b>CIP / NOR</b> | <b>8.47 / 9.67</b>                           | <b>298</b> | <b>This work</b> |

## 8. SEM spectra of the H<sub>C</sub>OPs after fluoroquinolones adsorption

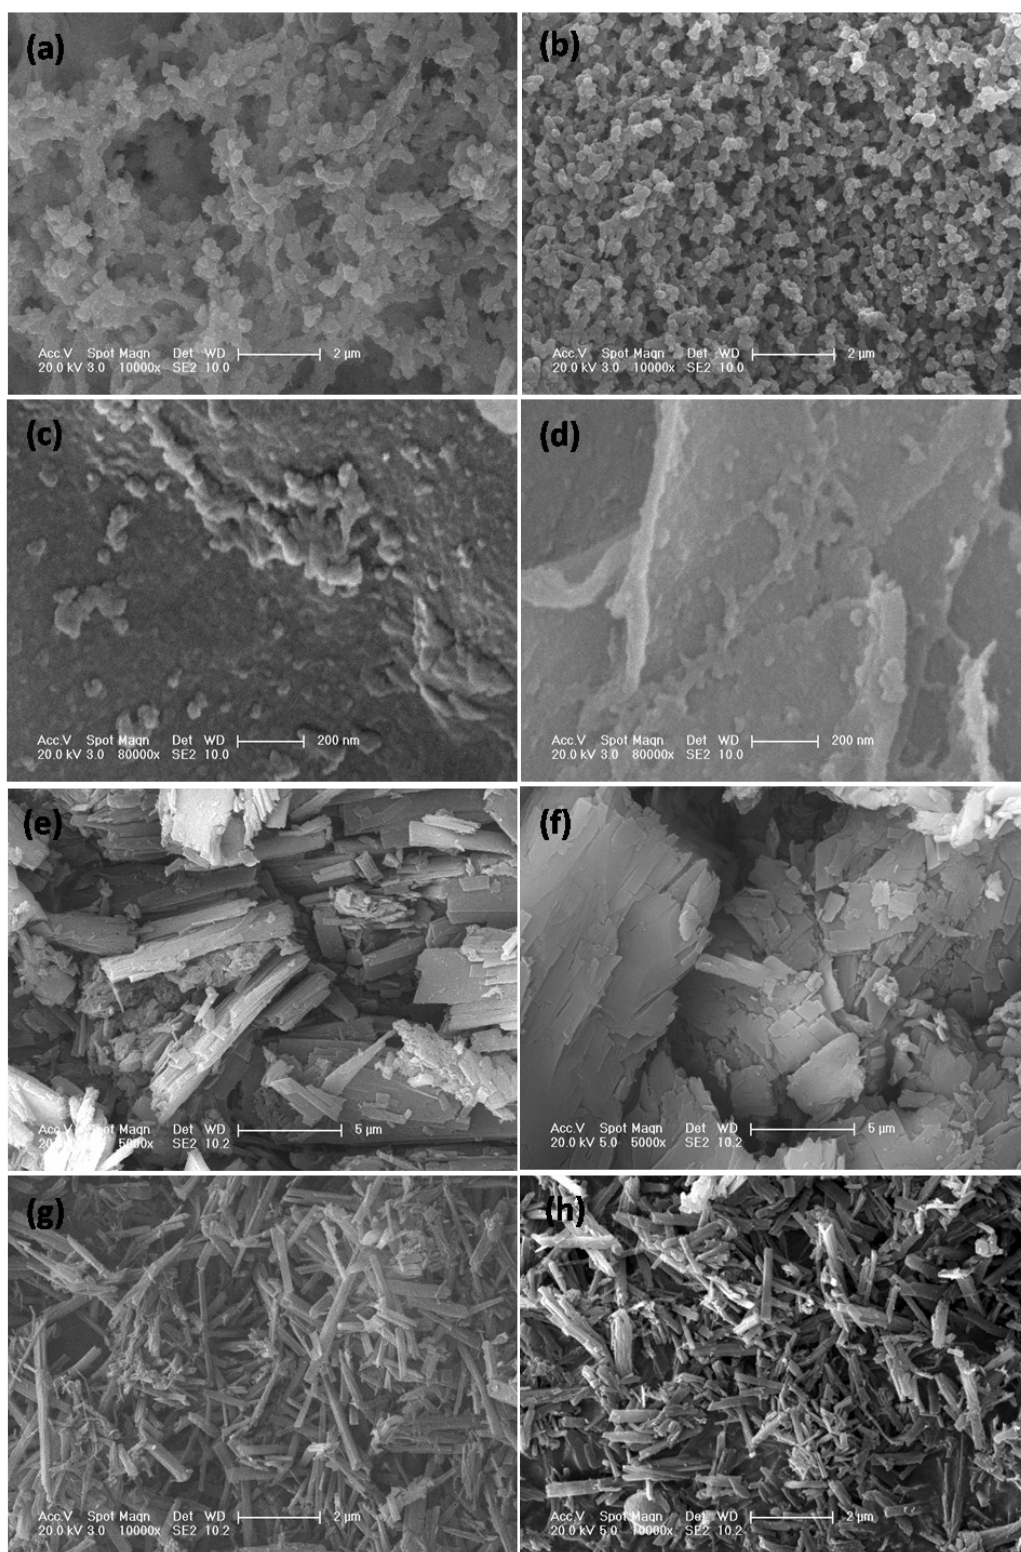

**Figure S12** SEM images of (a) CIP@H<sub>C</sub>OP-1, (b) NOR@H<sub>C</sub>OP-1, (c) CIP@H<sub>C</sub>OP-2, (d) NOR@H<sub>C</sub>OP-2, (e) CIP@H<sub>C</sub>OP-3, (f) NOR@H<sub>C</sub>OP-3, (g) CIP@H<sub>C</sub>OP-4 and (h)

NOR@H<sub>c</sub>OP-4.

### 9. FT-IR spectra of the H<sub>c</sub>OPs after fluoroquinolones adsorption

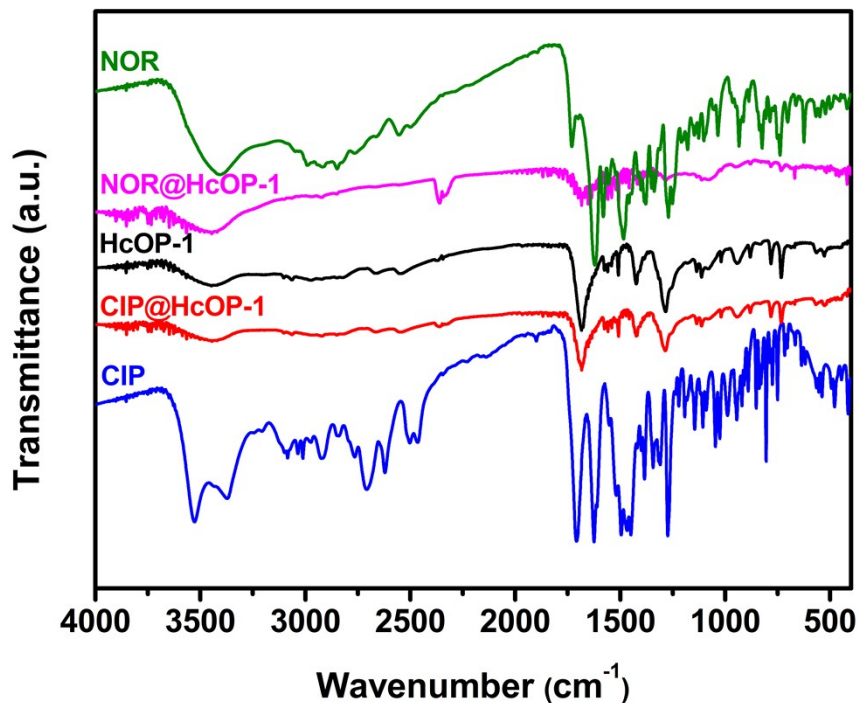

Figure S13 FT-IR spectra of CIP, NOR, H<sub>c</sub>OP-1, CIP@H<sub>c</sub>OP-1 and NOR@H<sub>c</sub>OP-1.

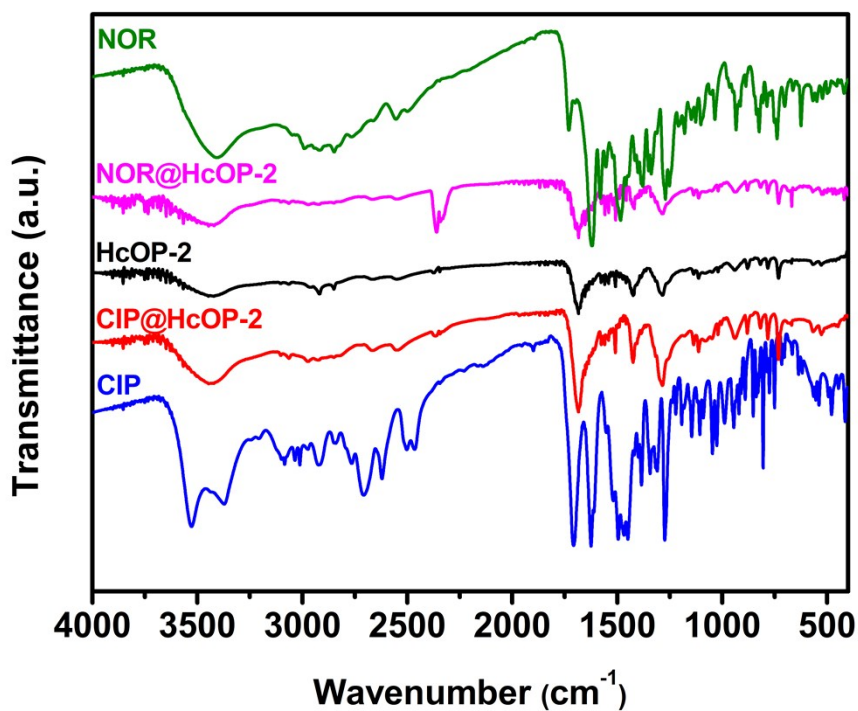

Figure S14 FT-IR spectra of CIP, NOR, H<sub>C</sub>OP-2, CIP@H<sub>C</sub>OP-2 and NOR@H<sub>C</sub>OP-2.

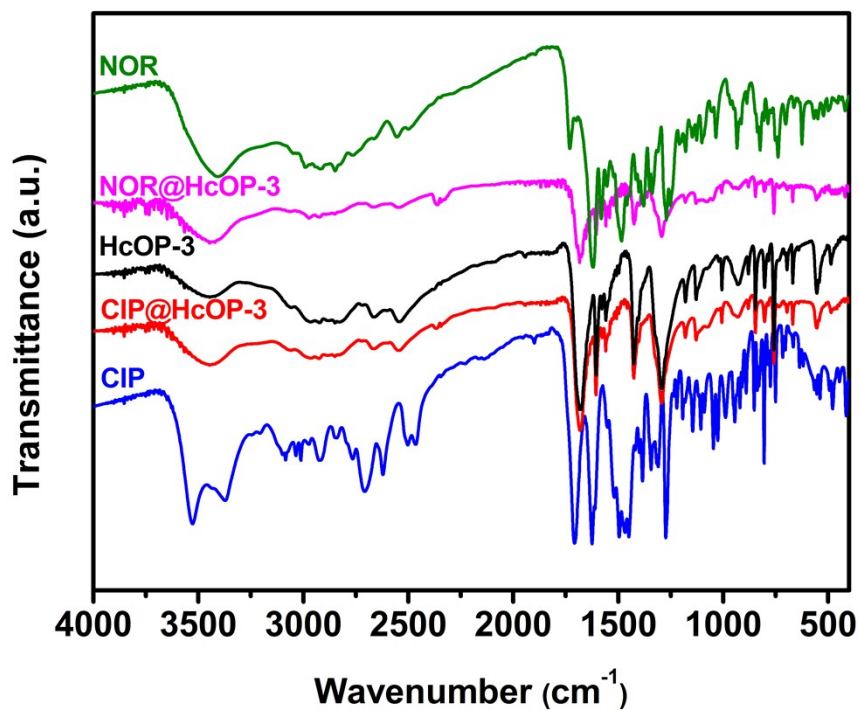

Figure S15 FT-IR spectra of CIP, NOR, H<sub>C</sub>OP-3, CIP@H<sub>C</sub>OP-3 and NOR@H<sub>C</sub>OP-3.

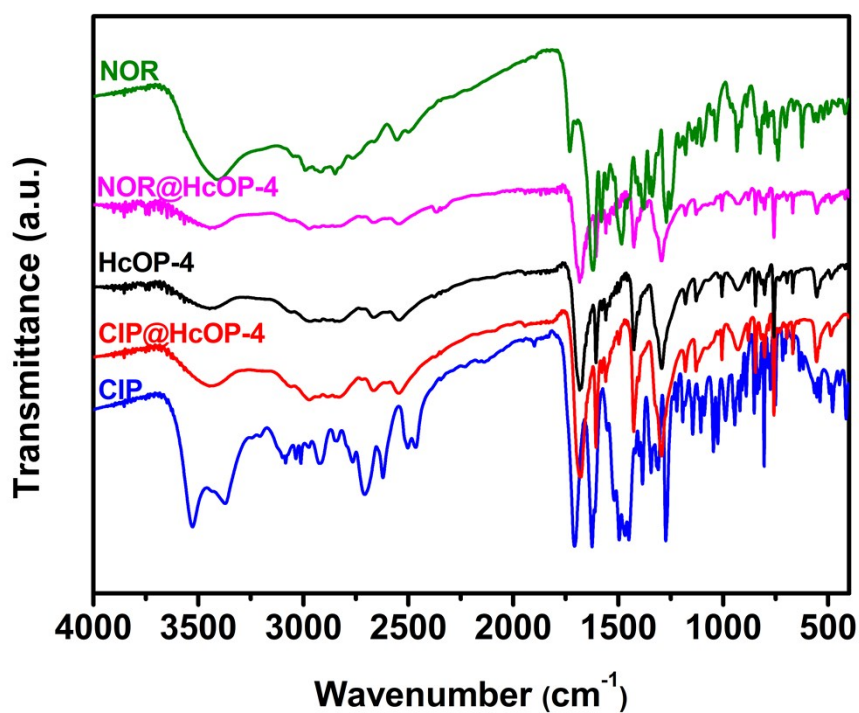

Figure S16 FT-IR spectra of CIP, NOR, H<sub>C</sub>OP-4, CIP@H<sub>C</sub>OP-4 and NOR@H<sub>C</sub>OP-4.

## 10. Supporting references

- [1] J. M. Duan and B. Su, *Chem. Eng. J.*, 2014, **246**, 160–167.
- [2] S. Lagergren, *Kungliga Svenska Vetenskapsakademiens Handlingar*, 1898, 24, 1–39.
- [3] Y. S. Ho and G. McKay, *Process Biochem.*, 1999, **34**, 451–465.
- [4] S. X. Duan, R. F. Tang, Z. C. Xue, X. X. Zhang, Y. Y. Zhao, W. Zhang, J. H. Zhang, B. Q. Wang, S. Y. Zeng and D. Z. Sun, *Colloids Surf., A*, 2015, **469**, 211–223.
- [5] I. Langmuir, *J. Am. Chem. Soc.*, 1918, **40**, 1361–1403.
- [6] H. Freundlich and W. Heller, *J. Am. Chem. Soc.*, 1939, **61**, 2228–2230.
- [7] X. M. Peng, F. P. Hu, F. L. Y Lam, Y. J. Wang, Z. M. Liu and H. L. Dai, *J. Colloid Interface Sci.*, 2015, **460**, 349–360.
- [8] A. A. Mackay and D. E. Seremet, *Environ. Sci. Technol.*, 2008, **42**, 8270–8276.
- [9] Z. J. Liang, Z. W. Zhao, T. Y. Sun, W. X. Shi and F. Y. Cui, *J. Hazard. Mater.*, 2016, **305**, 8–14.
